# Supplementary material for: Western-Type Helicobacter pylori CagA are the Most Frequent Type in Mongolian Patients
Source: PubMed Central journal article supplement (PMC6562502; doi:10.3390/cancers11050725), 2019-05-24
Supplement: cancers-11-00725-s001.pdf [file cancers-11-00725-s001.pdf]

# Supplementary Material: Western-Type *Helicobacter pylori* CagA are the Most Frequent Type in Mongolian Patients

Tegshee Tserentogtokh, Boldbaatar Gantuya, Phawinee Subsomwong, Khasag Oyuntsetseg, Dashdorj Bolor, Yansan Erdene-Ochir, Dashdorj Azzaya, Duger Davaadorj, Tomohisa Uchida, Takeshi Matsuhisa and Yoshio Yamaoka

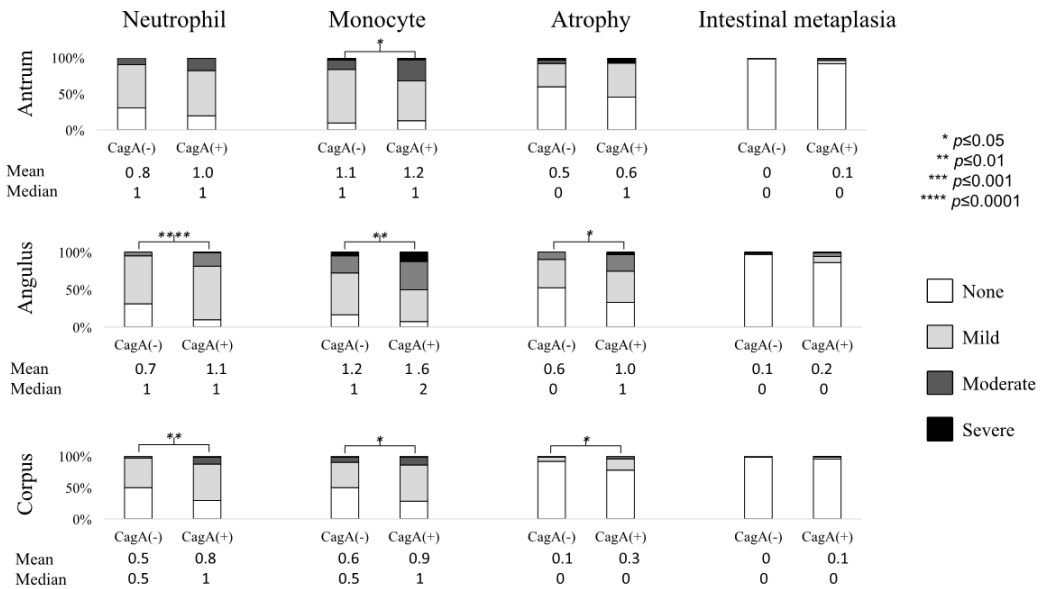

**Figure S1.** CagA status based on histological status. The distribution and mean values of histological status are shown based on *cagA*-negative and *cagA*-positive cases.

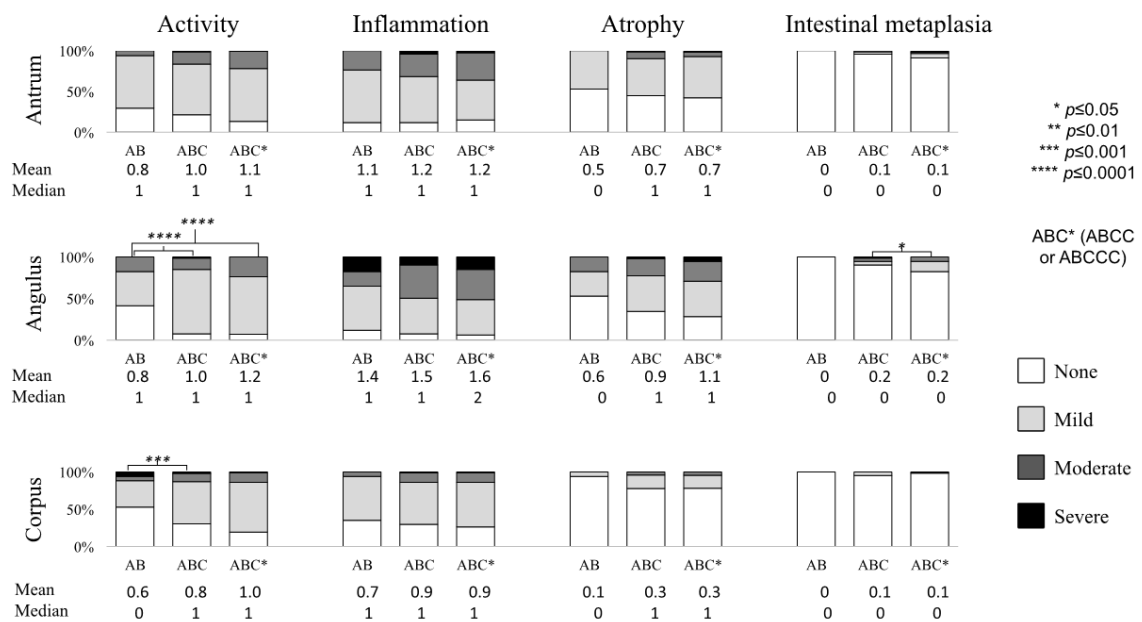

**Figure S2.** Western-type CagA types based on histological status. The distribution and mean values of histological status are shown based on Western-type CagA types.

Table S1. Patient demography.

| Disease status | Mean ages | Ages (Std. Deviation) | Minimum age | Maximum age | Female patients | Male patients |
|----------------|-----------|-----------------------|-------------|-------------|-----------------|---------------|
| Gastric cancer | 59.9      | 14.4                  | 36          | 81          | 5               | 12            |
| Gastritis      | 42.3      | 13.6                  | 16          | 79          | 246             | 95            |
| Ulcers         | 46.6      | 9.2                   | 30          | 58          | 7               | 3             |

Table S2. The *CagA* and *vacA* genotyping based on geography.

| <i>cagA</i> genotypes |                | Ulaanbaatar <i>n</i><br>= 117 (%) | Uvs <i>n</i> =<br>21 (%) | Khuvsgul <i>n</i><br>= 31 (%) | Khentii<br>N = 89 (%) | Umnugovi<br><i>n</i> = 93 (%) |           |
|-----------------------|----------------|-----------------------------------|--------------------------|-------------------------------|-----------------------|-------------------------------|-----------|
| CagA                  | Negative (-)   | 24 (20.5)                         | 7 (33.3)                 | 5 (16.1)                      | 16 (18)               | 10 (10.8)                     |           |
|                       | AB             | 8 (6.8)                           | 0                        | 3 (9.7)                       | 2 (2.2)               | 2 (2.2)                       |           |
|                       | ABB            | 1 (0.8)                           | 0                        | 0                             | 0                     | 0                             |           |
|                       | ABBB           | 0                                 | 0                        | 0                             | 0                     | 1 (1.1)                       |           |
|                       | Western ABBC   | 0                                 | 0                        | 0                             | 1 (1.1)               | 1 (1.1)                       |           |
|                       | ABC            | 47 (40.5)                         | 5 (23.8)                 | 12 (38.7)                     | 31 (34.8)             | 48 (51.6)                     |           |
|                       | ABCC           | 34 (29)                           | 9 (42.9)                 | 10 (32.3)                     | 35 (39.3)             | 21 (22.6)                     |           |
|                       | ABCCC          | 0 (0)                             | 0                        | 1 (3.2)                       | 2 (2.2)               | 2 (2.2)                       |           |
|                       | East-Asian ABD | 1 (0.8)                           | 0                        | 0                             | 3 (2.2)               | 6 (6.5)                       |           |
|                       | ABBD           | 1 (0.8)                           | 0                        | 0                             | 0                     | 2 (2.2)                       |           |
|                       | Hybrid ABDC    | 1 (0.8)                           | 0                        | 0                             | 0                     | 0                             |           |
|                       | <i>vacA</i>    | S region s1                       | 96 (82)                  | 13 (65)                       | 24 (82.8)             | 71 (81.6)                     | 80 (88.9) |
|                       |                | s2                                | 21 (18)                  | 7 (35)                        | 5 (17.2)              | 16 (18.4)                     | 10 (11.1) |
| M region m1           |                | 64 (54.7)                         | 11 (55)                  | 21 (72.4)                     | 44 (50.6)             | 50 (55.6)                     |           |
| m2                    |                | 53 (45.3)                         | 9 (45)                   | 8 (27.6)                      | 43 (49.4)             | 40 (44.4)                     |           |

**Table S3.** Multivariate analysis for CagA types based on histological features of gastritis

| Histology diagnosis     | CagA types | P value | OR   | Lower 95% C.I. | Upper 95% C.I. |
|-------------------------|------------|---------|------|----------------|----------------|
|                         | Negative*  |         |      |                |                |
| Neutrophil infiltration | AB         | NS      | 0.9  | 0.2            | 4              |
|                         | ABC        | 0.002   | 5.8  | 1.9            | 18             |
|                         | ABCC       | 0.003   | 10.8 | 2.3            | 51             |
|                         | ABCCC      | NS      | 0.9  | 0.1            | 9              |
|                         | ABD        | NS      | 2.1  | 0.2            | 18             |
|                         | Negative*  |         |      |                |                |
| Monocyte infiltration   | AB         | NS      | 0.5  | 0.05           | 6              |
|                         | ABC        | NS      | 1.0  | 0.2            | 5              |
|                         | ABCC       | NS      | 3.8  | 0.3            | 42             |
|                         | ABCCC      | -       | -    | -              | -              |
|                         | ABD        | -       | -    | -              | -              |
|                         | Negative*  |         |      |                |                |
| Atrophy                 | AB         | NS      | 0.8  | 0.2            | 2              |
|                         | ABC        | NS      | 1.7  | 0.8            | 3              |
|                         | ABCC       | 0.04    | 2.2  | 1.0            | 5              |
|                         | ABCCC      | NS      | 0.8  | 0.1            | 5              |
|                         | ABD        | NS      | 2.0  | 0.4            | 10             |
|                         | Negative*  |         |      |                |                |
| Intestinal metaplasia   | AB         | -       | -    | -              | -              |
|                         | ABC        | 0.02    | 4.5  | 1.3            | 15             |
|                         | ABCC       | 0.002   | 7.0  | 2.0            | 24             |
|                         | ABCCC      | 0.03    | 9.8  | 1.3            | 77             |
|                         | ABD        | 0.002   | 14.0 | 2.7            | 72             |

\*used as control, NS (not significant)

**Table S4.** Multivariate analysis for *vacA* genotypes based on histological features of gastritis.

| Histology diagnosis     | <i>vacA</i> genotypes | p value | OR  | Lower 95% C.I. | Upper 95% C.I. |
|-------------------------|-----------------------|---------|-----|----------------|----------------|
| Neutrophil infiltration | s2/m2*                |         |     | -              |                |
|                         | s1/m2                 | 0.02    | 3.7 | 1.2            | 11.5           |
|                         | s1/m1                 | 0.001   | 5.4 | 2.0            | 14.9           |
| Monocyte infiltration   | s2/m2*                |         |     | -              |                |
|                         | s1/m2                 | NS      | 0.6 | 0.1            | 3.4            |
|                         | s1/m1                 | NS      | 3.4 | 0.5            | 24.4           |
| Atrophy                 | s2/m2*                |         |     | -              |                |
|                         | s1/m2                 | NS      | 1.4 | 0.7            | 2.9            |
|                         | s1/m1                 | 0.04    | 2.0 | 1.0            | 3.8            |
| Intestinal metaplasia   | s2/m2*                |         |     | -              |                |
|                         | s1/m2                 | 0.04    | 3.9 | 1.1            | 14.0           |
|                         | s1/m1                 | 0.003   | 6.2 | 1.9            | 20.7           |

\*used as control, NS (not significant)
